# Supplementary material for: Oral Fingolimod or Intramuscular Interferon for Relapsing Multiple Sclerosis
Source: Atypon-hosted journal article supplement (doi:10.1056/nejmoa0907839), 2010-01-20
Supplement: nejm_cohen_402sa1.pdf [file nejm_cohen_402sa1.pdf]

## Supplementary Appendix

This appendix has been provided by the authors to give readers additional information about their work.

Supplement to: Cohen JA, Barkhof F, Comi G, et al. Oral fingolimod or intramuscular interferon for relapsing multiple sclerosis. *N Engl J Med* 2010;362:402-15. DOI: 10.1056/NEJMoa0907839.

## APPENDIX

**Steering Committee:** J. Cohen (Chair), F. Barkhof, G. Comi, H.-P. Hartung, L. Kappos, B. Khatri, X. Montalban, J. Pelletier.

**Data and Safety Monitoring Board:** J. D. Easton (Chair, neurologist), T. Calandra (infectious disease specialist), J. DiMarco (cardiologist), L. Hudson (pulmonologist), J. Kesselring (MS neurologist), A. Laupacis (internist), N. Temkin (statistician), B. Weinshenker (MS neurologist), M. Zarbin (ophthalmologist).

**MRI Central Analysis Center:** Image Analysis Centre, VU Medical Center, Amsterdam, The Netherlands. F. Barkhof (Director), P. Poppe.

**Study Sites and Principal Investigators:** **Argentina:** Instituto de Neurociencias de Rosario, G. Luetic; Hospital Italiano de Buenos Aires, E. Cristiano; Instituto de Neurociencias Buenos Aires INEBA, F. Caceres; Hospital Jose Maria Ramos Mejia, O. Garcea; FLENI, J. Correale; Fundacion Rosarina de Neurorehabilitacion, C. Ballario; Fundacion Lenox, R. Piedrabuena; **Australia:** Royal Prince Alfred Hospital, J. Pollard; Strategic Health Evaluators, R. Beran; Liverpool Hospital, S. Hodgkinson; St George Private Hospital, R. Schwartz; Gosford Private Hospital, R. Heard; Royal Melbourne Hospital, J. King; Box Hill Hospital, H. Butzkueven; **Austria:** Evangel.Krankenh./Wien-Waehring Außenstelle, E.-M. Maida; Univ.-Klinik fuer Neurologie AKH, K. Vass; Landeskrankenhaus St. Poelten, C. Franta-Elmer; Universitätsklinik Innsbruck, T. Berger; OO. Landes-Narvenklinik Wagner-Jauregg, F. Aichner; Landes-Nervenklinik Christian Doppler Klinik, G. Ladurner; **Belgium:** UZ Brussel, V. Bissay; Cliniques Universitaires Saint-Luc, C. Sindic; Nationaal Multiple Sclerose Centrum v.z.w, M. D'Hooghe; Regionaal Ziekenhuis Sint-Trudo - Campus Sint-Jozef, E. Mulleners; **Brazil:** Hospital de

Clínicas da UNICAMP, B. Damasceno; Hospital das Clinicas da Fac de Medicina de Rib. Preto USP, A. Barreira; Hospital dos Servidores do Estado do Rio de Janeiro, R. Naylor; Hospital Universitario Gaffree e Guinle, R. Alvarenga; Hospital Sao Rafael, A. Bacellar; Complexo Hospitalar Santa Casa de Porto Alegre, S. Haussen; **Canada:** CHUM - Hopital Notre-Dame, P. Duquette; Montreal Neurological Institute, J. Antel; Centre Hospitalier Universitaire de Sherbrooke, A. Lamontagne; Charles Lemoyne Hospital, F. Grand'maison; The Ottawa General Hospital, M. Freedman; Nepean Medical Centre, S. Christie; St. Michael's Hospital, P. O'Connor; Fraser Health MS Clinic, G. Vorobeychik; UBC Hospital, V. Devonshire; **Egypt:** Mohamed Ramadan Private Clinic, M. Ramadan; Sherif Hamdy Private Clinic, S. Hamdy; Elbahey Reda Private Clinic, E. Reda; Saher Hashem Private Clinic, S. Hashem; Magd Fouad Private Clinic, M. Fouad; **France:** Hoppital Pasteur, Archet II, C. Lebrun-Frenay; CHU La Timone, J. Pelletier; Hopital De Purpan, M. Clanet; Hôpital Pellegrin, B. Brochet; Hopital Central, M. Debouverie; Centre Hospitalier de Poissy, O. Heinzlef; **Germany:** Universitaetsklinikum der TU Dresden, T. Ziemssen; Saechsisches Krankenhaus Hubertusburg, W. Koehler; Neurologisches Facharztzentrum Berlin, K. Tiel-Wilck; Gemeinschaftspraxis Dr. Burger-Deinerth/Dr. Bachus, R. Bachus; Praxis Dr. Altmann, N. Altmann; Asklepios Landeslinik Teupitz, J. Faiss; Oberhavel Kliniken GmbH, K. Baum; Universitaetsklinik Greifswald, A. Dressel; Krankenhaus Buchholz u. Winsen gemeinnützige GmbH, K. Luckner; Klinikum Bremen-Mitte Gesundheit Nord GmbH, M. Ebke; Kliniken d. Medizinischen Hochschule Hannover, M. Stangel; Universitaetsklinikum Duesseldorf, H.-P. Hartung; Klinik und Poliklinik fur Neurologie, H.-C. Diener; Westfaelische Klinik Lengerich, F. Bethke; Staedt. Krankenhaus Merheim, V. Limmroth; Krankenhaus der Barmherzigen Brueder, M. Maschke; Johannes Gutenberg-Universität Mainz, F. Thoemke; Neuro Centrum Odenwald, Praxis Erbach, G. Reifschneider; Universitaetskliniken des Saarlandes, R. Diehm; Klinikum der Universität Heidelberg, B. Wildemann; Univ.-Klinikum Tübingen, A. Melms; Univ.-Klinikum Freiburg, S. Rauer; Praxis Dr. Karlbauer, G. Karlbauer; Klinikum der TU München, A. Berthele; NeuroPoint

GmbH, M. Lang; Neurologische Poliklinik der Universitaet Ulm, H. Tumani; Klinikum Bamberg, P. Krauseneck; Medizinisches Studienzentrum, M. Klein; **Greece:** Errikos Dinan General Hospital, A. Papadimitriou; General Hospital of Athens G. Gennimatas, K. Karageorgiou; Metropolitan Hospital, D. Liakopoulos; Ahepa University General Hospital of Thessaloniki, N. Tascos; Univ. Hospital of Heraklion, A. Plaitakis; General University Hospital of Patra-Rio, P. Papathanasopoulos; **Hungary:** Peterfy Sandor utcai Korhaz, G. Panczel; Uzsoki Korhaz, G. Jakab; Debreceni Egyetem Orvos es Egszstd. Centr., L. Csiba; Pecs Tudomanyegyetem Neurologiai Klinika, S. Komoly; Petz Aladár Megyei Oktató Kórház, A. Csanyi; Veszprem Megyei Csolnoky Ferenc Korhaz, L. Bartos; **Italy:** Univ.Tor Vergata - AUSL ROMA B - Sede Territoriale, D. Centonze; Azienda Ospedaliera Sant'Andrea - Università La Sapienza, C. Pozzilli; Presidio Ospedaliero Roberto Binaghi, M.G. Marrosu; Az.Ospedaliero-Universitaria S. Luigi Gonzaga, A. Bertolotto; Az.Ospedaliera Universit.S.Martino-Università degli Studi, G. Mancardi; Fond.IRCCS Osp.Magg.Pol.Mangiagalli e Reg.Elena Univ. Studi, E. Scarpini; Istituto Scientifico San Raffaele – IRCCS, G. Comi; Az. Osp. Niguarda Ca' Granda-Università degli Studi di Mila, A. Protti; Ospedale S. Antonio Abate, A. Ghezzi; Pres.Osped.di Montichiari-Az.Osped. Spedali Civili Brescia, R. Capra; IRCCS Neurologico C. Mondino, R. Bergamaschi; A.O.-Università di Padova-Università degli Studi, P. Gallo; Ospedale Bellaria, S. Stecchi; Presidio Ospedaliero di Vaio Fidenza, E. Montanari; A.O.Universitaria Arcispedale Sant'Anna Univers. degli Studi, M.R. Tola; A.Osp-Univers.Careggi-Università degli Studi-Policlin Univer, M.P. Amato; AOU Ospedali Riuniti Umberto I-GM Lancisi-G.Salesi-Univ.Stud, M. Silvestrini; Osp.Clinicizz.SS. Annunziata Colle dell'Ara Univ.D'Annunzio, A. Lugaresi; A.O.Policlinico di Bari - Università degli Studi, M. Trojano; A.Osp-Univ.Policl.Federico II-Univ Federico II, V. Brescia Morra; Ist. Neurol. Mediterraneo Neuromed, S. Ruggieri; Az. Osp. -Universitaria Policlinico G. Rodolico, F. Patti; **Korea, Republic of:** Yonsei University College of Medicine Severance Hospital, S.-M. Kim; Samsung Medical Center, K.-H. Lee; National Cancer Center, H.-J. Kim; Kyung Pook National University Hospital, S.-P. Park; **Portugal:** Hospital Fernando Fonseca, R.

Ginestal, A. V. Salgado; Centro Hospitalar de Setubal, EPE - Hospital de São Bernardo, P. Fontoura; Hospitais da Universidade de Coimbra, L. Cunha, L. Sousa; HSJ-Hospital de São Joao, EPE, M.J. Sá; HSAC - Centro Hospitalar de Lisboa Central, EPE, R. Pedrosa; **Spain:** Hospital Vall D'Hebron, X. Montalban; Ciutat Sanitaria I Universitaria de Bellvitage, T. Arbizu; Hospital Clinico San Carlos, R. Arroyo; Hospital Puerta de Hierro Majadahonda, J.A. Garcia Merino; Complejo Hospitalario Carlos Haya, O. Fernandez; Hospital Universitario Virgen Macarena, G. Izquierdo; Hospital Universitario La Fe, B. Casanova; Hospital de Basurto, A. Antigüedad; **Switzerland:** Universitätsspital Zuerich, N. Goebels; Universitätsspital Basel, L. Kappos; **United Kingdom:** The Walton Centre for Neurology and Neurosurgery, C. Young; Norfolk & Norwich University Hospital, M. Lee; Essex Neuroscience Centre, A. Chaudhuri; Charing Cross Hospital, R. Nicholas; **United States:** Caribbean Center for Clinical Research, Inc., A. Chinea Martinez; Yale Multiple Sclerosis Center, J. Preiningerova; Associated Neurologists, P.C., D. Greco; Associated Neurologists of Southern Connecticut, P.C., J. Gross; Island Neurological Associates, S. Newman; University of Pittsburgh, G. Mitchell; West Virginia University - Clinical Trials Research Unit, G. Pawar; Raleigh Neurology Associates, S. M. Freedman; Neuroscience and Spine Institute, M. Kaufman; Absher Neurology, J. Absher; University of Florida, D. Kantor; AMO Corporation, R. Ayala; Neurology Associates, W. Honeycutt; MS Center of Vero Beach, S. Shafer; Neurological Associates; B. Steingo; University of Miami, S. Delgado; Axiom Clinical Research of Florida, M. Cascione; University of South Florida, C. Brock; Roskamp Institute, A. Keegan; North Central Neurology Associates, P.C., C. LaGanke; Advanced Neurosciences Institute, S. Hunter; Mountain Empire Neurological Associates, P.C., E. Wilson; Cleveland Clinic Foundation, J. Cohen; Neurology & Neuroscience Associates, Inc., A. Mazhari; Northern Ohio Neuroscience, L.L.C., W. Bauer; St. Luke's Medical Center, B. Khatri; The MS Center for Innovation in Care, B. Singer; University of Kansas Medical Center, S. Lynch; Mid America Neuroscience Institute, V. Rowe; Baylor College of Medicine, G. Hutton; Integra Clinical Research, S. Gazda; Private Practice, B. Dihenia; Barrow

Neurological Clinics at St. Joseph's Hospital and Medical Center, D. Campagnolo; The  
Neurology Center, T. Chippendale; Oregon Neurology, P.C., P. Ash; Swedish Neuroscience  
Institute, L. Jung; Rockwood Clinic, M. Olek.

## **ADDITIONAL METHODOLOGICAL DETAILS.**

### **Study Endpoints and Procedures**

In addition to the evaluations outlined in the main manuscript, ophthalmic examinations (including optical coherence tomography) and pulmonary function tests were performed at screening and months 1, 3, 6, and 12. Source documents for all suspected cases of macular edema were reviewed centrally by an independent retinal specialist. Skin examination was included in the general physical examination performed by the Treating Neurologist at Screening, and months 6 and 12. Following reports of skin malignancies in the fingolimod phase II study,<sup>1,2</sup> the protocol was amended to include regular dermatologic monitoring of all participants: monthly self-examination by participants and examination by a dermatologist at screening and month 12. All participants had been enrolled when this amendment was implemented, so the initial dermatologist examination occurred for all participants after dosing had commenced.

Relapses were treated with intravenous methylprednisolone up to 1000 mg/day for 3–5 days without an oral taper.

MR scans were acquired according to a standard protocol using 3 mm slices and included dual-echo T2-weighted and T1-weighted images before and after administration of single-dose gadolinium. Sites were required to successfully perform a dummy-run to optimize scan quality, and all subsequent scans had quality control performed by Perceptive Imaging who coded the images for central analysis by the Image Analysis Center in Amsterdam (Appendix) according to their Standard Operating Procedures.<sup>3</sup> New and enhancing lesions were identified by certified radiology reviewers, and their volumes determined by trained technicians using semi-quantitative software (Alice). Brain volume was measured with the Structural Image Evaluation Using Normalization of Atrophy (SIENA) program.<sup>4</sup>

The primary efficacy endpoint was annualized relapse rate, defined as the number of confirmed relapses over 12 months, and analyzed using a negative binomial regression model adjusted for treatment group, country, number of relapses in the 2 years before baseline, and baseline Expanded Disability Status Scale (EDSS) score, based on exploratory analyses of the phase II data and pre-specified in the protocol. The two key secondary endpoints were number of new or enlarged T2-hyperintense lesions at month 12 and time to confirmed disability progression. Disability progression was defined as a 1.0-point increase in EDSS score (0.5-point increase for baseline EDSS score  $\geq 5.5$ ), confirmed 3 months later in the absence of relapse. Secondary clinical endpoints also included time to first relapse, proportion of participants with confirmed disability progression, and changes in EDSS score and MS Functional Composite (MSFC) z-score from baseline to month 12. Secondary MRI endpoints included proportion of participants free from new or enlarged T2 or gadolinium-enhancing T1 lesions, and number and volume of gadolinium-enhancing T1 lesions. Additional MRI endpoints were changes from baseline in the volumes of T2 hyperintense and T1 hypointense lesions, and percentage change in brain volume.

### **Statistical Analysis**

The modified intent-to-treat cohort (n=1280), comprising all randomized participants who received at least 1 study drug dose, was the pre-specified primary efficacy analysis population. All participants were encouraged to continue on-study for follow-up assessments after discontinuation of study drug, and all data available for these participants, including data acquired after study drug discontinuation, were included in the analyses, i.e. relapses reported after study drug discontinuation were included. For participants who withdrew from the study prior to month 12, the number of relapses up to the time of discontinuation was used in the negative binomial regression model, and no imputation was applied for the time from study discontinuation to month 12. The per protocol population (n=1246) comprised all participants

without major protocol violations. Safety analyses were performed for the safety population (all participants who received at least 1 dose of study drug; n=1280) and were summarized using descriptive statistics without inferential significance testing.

Number of new or enlarged T2 lesions at month 12 was analyzed using a negative binomial regression model, adjusting for country, number of relapses in the 2 years before baseline, and baseline EDSS score. Time to confirmed disability progression was estimated using the Kaplan–Meier method and logistic regression model adjusting for baseline EDSS score and age. Cox’s proportional hazards model was used to model time-to-event and was adjusted for treatment, country, baseline EDSS score, and age. The proportions of relapse-free participants at month 12 (Kaplan–Meier estimates) were compared using a logistic regression model adjusting for country, number of relapses in the previous 2 years, and baseline EDSS score. Cox regression model was used to compare time to first relapse using the same covariates as the primary analysis. Changes in EDSS score and MSFC z-score from baseline were compared using Wilcoxon–Mann–Whitney rank-sum test and analysis of covariance on ranks. Other MRI endpoints were analyzed by non-parametric Wilcoxon–Mann–Whitney rank-sum tests and analysis of covariance on ranks model adjusting for treatment, country, and corresponding MRI baseline measurement for continuous and count variables, and a logistic regression model adjusting for treatment, country, and corresponding MRI baseline measurement for proportions.

## References

1. Kappos L, Antel J, Comi G, et al. Oral fingolimod (FTY720) for relapsing multiple sclerosis. *N Engl J Med* 2006;355:1124-40.
2. O'Connor P, Comi G, Montalban X, et al. Oral fingolimod (FTY720) in multiple sclerosis. Two-year results of a phase II extension study. *Neurology* 2009;72:73-9.
3. VU University Medical Center Image Analysis Center. (Accessed July 28, 2009, at <http://www.vumc.com/afdelingen/iac.>)

4. Smith SM, Zhang Y, Jenkinson M, et al. Accurate, robust, and automated longitudinal and cross-sectional brain change analysis. *Neuroimage* 2002;17:479-89.

## HEMATOLOGY AND BLOOD CHEMISTRY RESULTS

|                                                               |          | <b>Fingolimod<br/>1.25 mg<br/>(N = 420)</b> | <b>Fingolimod<br/>0.5 mg<br/>(N = 429)</b> | <b>IFNβ-1a<br/>(N = 431)</b> |
|---------------------------------------------------------------|----------|---------------------------------------------|--------------------------------------------|------------------------------|
| White blood cell<br>count (10 <sup>9</sup> /L)<br><br>Mean±SD | n        | 346                                         | 365                                        | 365                          |
|                                                               | Baseline | 6.4±1.9                                     | 6.4±1.7                                    | 6.4±1.8                      |
|                                                               | Month 12 | 4.1±1.5                                     | 4.4±1.7                                    | 6.3±2.0                      |
| Neutrophil count<br>(10 <sup>9</sup> /L)<br><br>Mean±SD       | n        | 340                                         | 360                                        | 360                          |
|                                                               | Baseline | 4.0±1.45                                    | 3.9±1.37                                   | 4.0±1.45                     |
|                                                               | Month 12 | 3.2±1.36                                    | 3.3±1.50                                   | 4.0±1.70                     |
| Lymphocyte<br>count (10 <sup>9</sup> /L)<br><br>Mean±SD       | n        | 339                                         | 359                                        | 359                          |
|                                                               | Baseline | 1.8±0.53                                    | 1.8±0.53                                   | 1.7±0.52                     |
|                                                               | Month 12 | 0.4±0.26                                    | 0.5±0.31                                   | 1.7±0.57                     |
| ALC<0.8 x 10 <sup>9</sup> /L<br>— no. (%) of<br>participants  |          | 412 (98.1)                                  | 422 (98.4)                                 | 79 (18.3)                    |
| ALC<0.4 x 10 <sup>9</sup> /L<br>— no. (%) of<br>participants  |          | 349 (83.1)                                  | 308 (71.8)                                 | 11 (2.6)                     |
| ALC<0.2 x 10 <sup>9</sup> /L<br>— no. (%) of<br>participants  |          | 143 (34.0)                                  | 64 (14.9)                                  | 3 (0.7)                      |
| Bilirubin<br>(µmoles/L)<br><br>Mean±SD                        | n        | 355                                         | 379                                        | 377                          |
|                                                               | Baseline | 2.3±1.19                                    | 2.4±1.29                                   | 2.4±1.49                     |
|                                                               | Month 12 | 2.4±1.33                                    | 2.6±1.41                                   | 2.2±1.27                     |
| AST (U/L)                                                     | n        | 357                                         | 380                                        | 377                          |

|                      |            |           |           |           |
|----------------------|------------|-----------|-----------|-----------|
| Mean±SD              | Baseline   | 19.6±6.0  | 19.4±6.1  | 21.6±38.2 |
|                      | Month 12   | 24.7±11.0 | 24.2±10.3 | 21.0±12.7 |
|                      | % ≥3 x ULN | 1.4%      | 2.1%      | 1.9%      |
| ALT (U/L)<br>Mean±SD | n          | 357       | 380       | 378       |
|                      | Baseline   | 20.6±11.5 | 20.9±11.5 | 25.4±65.8 |
|                      | Month 12   | 34.9±25.9 | 33.3±23.3 | 23.6±18.5 |
|                      | % ≥3 x ULN | 6.9%      | 8.4%      | 2.3%      |

ALC, absolute lymphocyte count; AST, aspartate transaminase; ALT, alanine transaminase; IFN, interferon; SD, standard deviation; ULN, upper limit of normal.
